# Supplementary material
Source: PubMed Central journal article supplement (PMC3962720)
Supplement: NIHMS546975-supplement-40262_2013_122_MOESM1_ESM.pdf [file NIHMS546975-supplement-40262_2013_122_MOESM1_ESM.pdf]

# **Integrated Population Pharmacokinetic/Viral Dynamic Modeling of Lopinavir/Ritonavir in HIV-1 Treatment Naïve Patients**

Kun Wang, David Z. D'Argenio, Edward P. Acosta, Anandi N. Sheth, Cecile Delille, Jeffrey L. Lennox, Corenna Kerstner-Wood, and Ighovwerha Ofotokun\*

## **Supplemental Digital Content**

These figures are the Supplemental Digital Content referred to in the full version of this article, which published at *Clinical Pharmacokinetics*

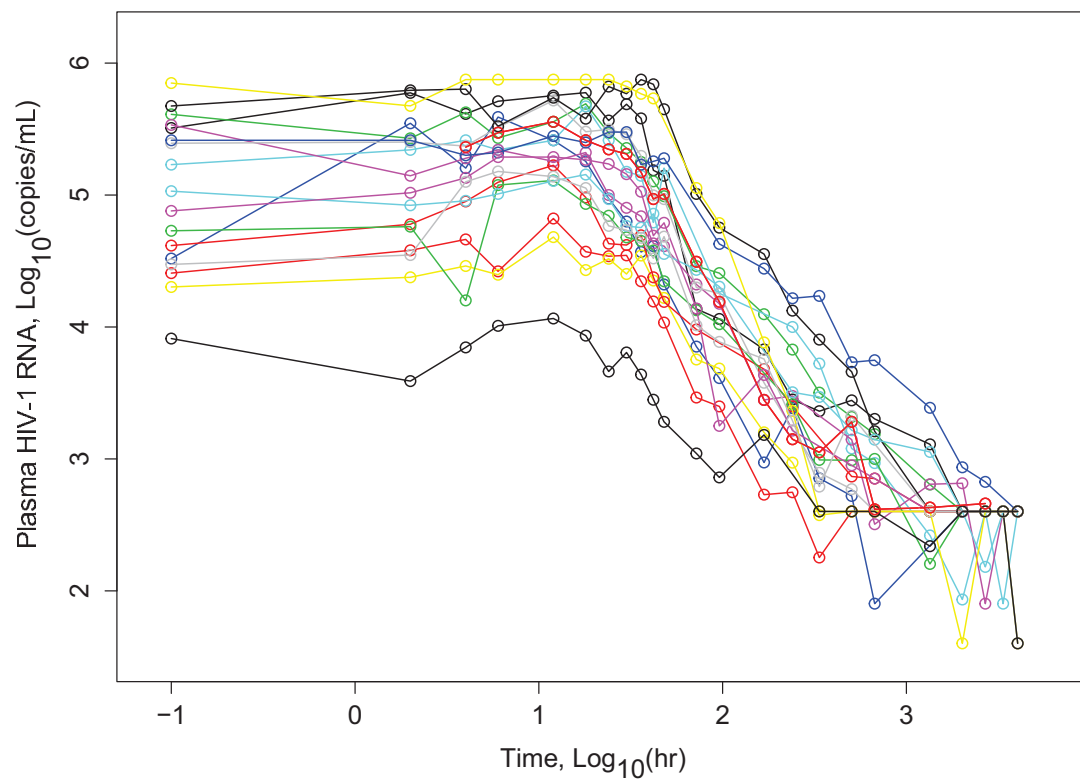

**Supplementary Fig. 1.** Plasma HIV-1 RNA change over time. Measurements above the limit of quantitation were set to 750,000 copies/mL.

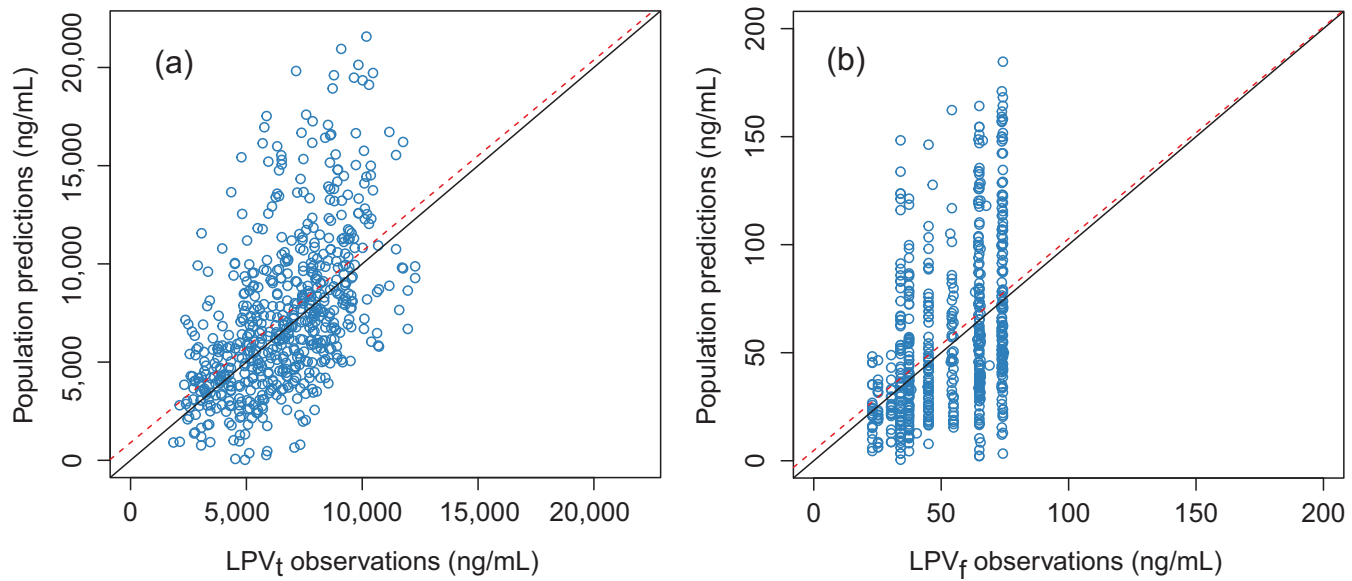

**Supplementary Fig.2.** Population prediction goodness of fit plots for the combined total lopinavir/ritonavir (LPV<sub>t</sub>/RTV) model (a) and the free lopinavir (LPV<sub>f</sub>) model (b). Symbols are observed data. Red dashed lines are the linear regression fit. Solid lines are the lines of unity.

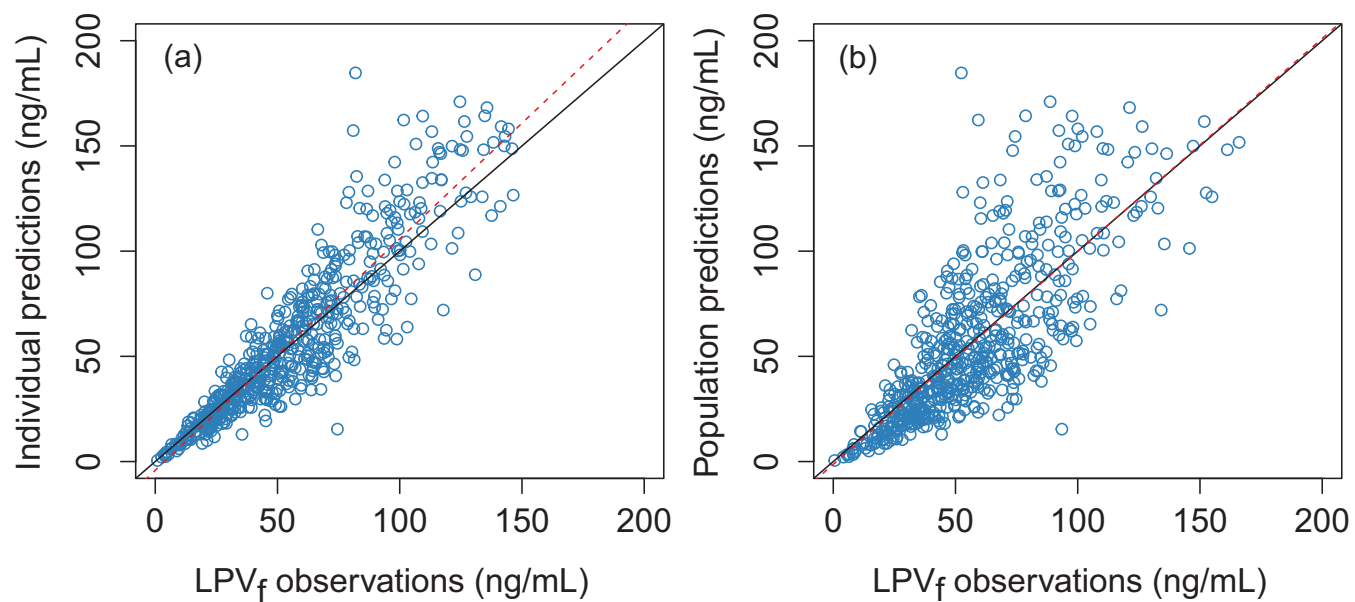

**Supplementary Fig.3.** Goodness of fit plots for alpha-1-acid glycoprotein - free lopinavir (AAG-LPV<sub>f</sub>) model (individual - (a) ; population - (b)). Symbols are the observed data. Red dashed lines are the linear regression. Solid black lines are the lines of unity.

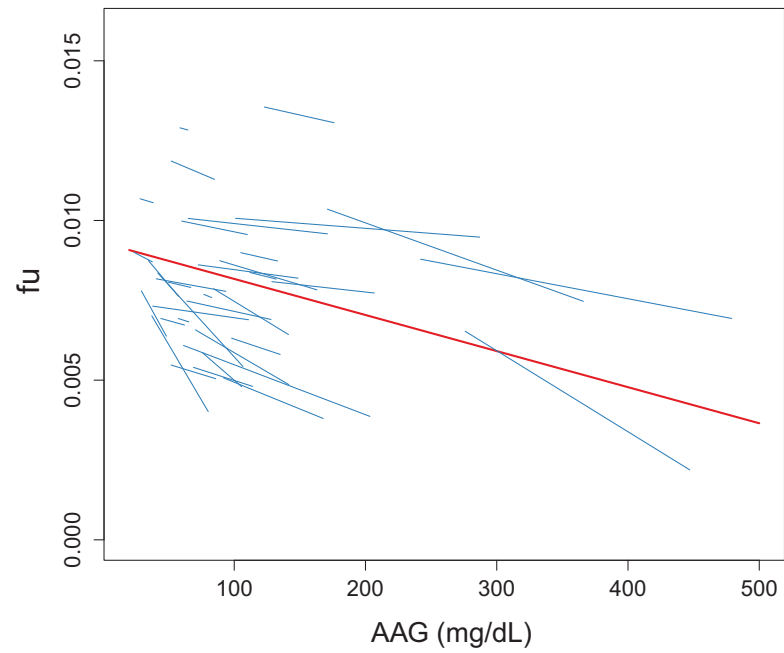

**Supplementary Fig.4.** Simulated  $f_u$  (fraction of unbound lopinavir) as a function of AAG (alpha-1-acid glycoprotein) for each individual. Red line is the population prediction. The blue lines are individual predictions over the AAG range measured in each subject.

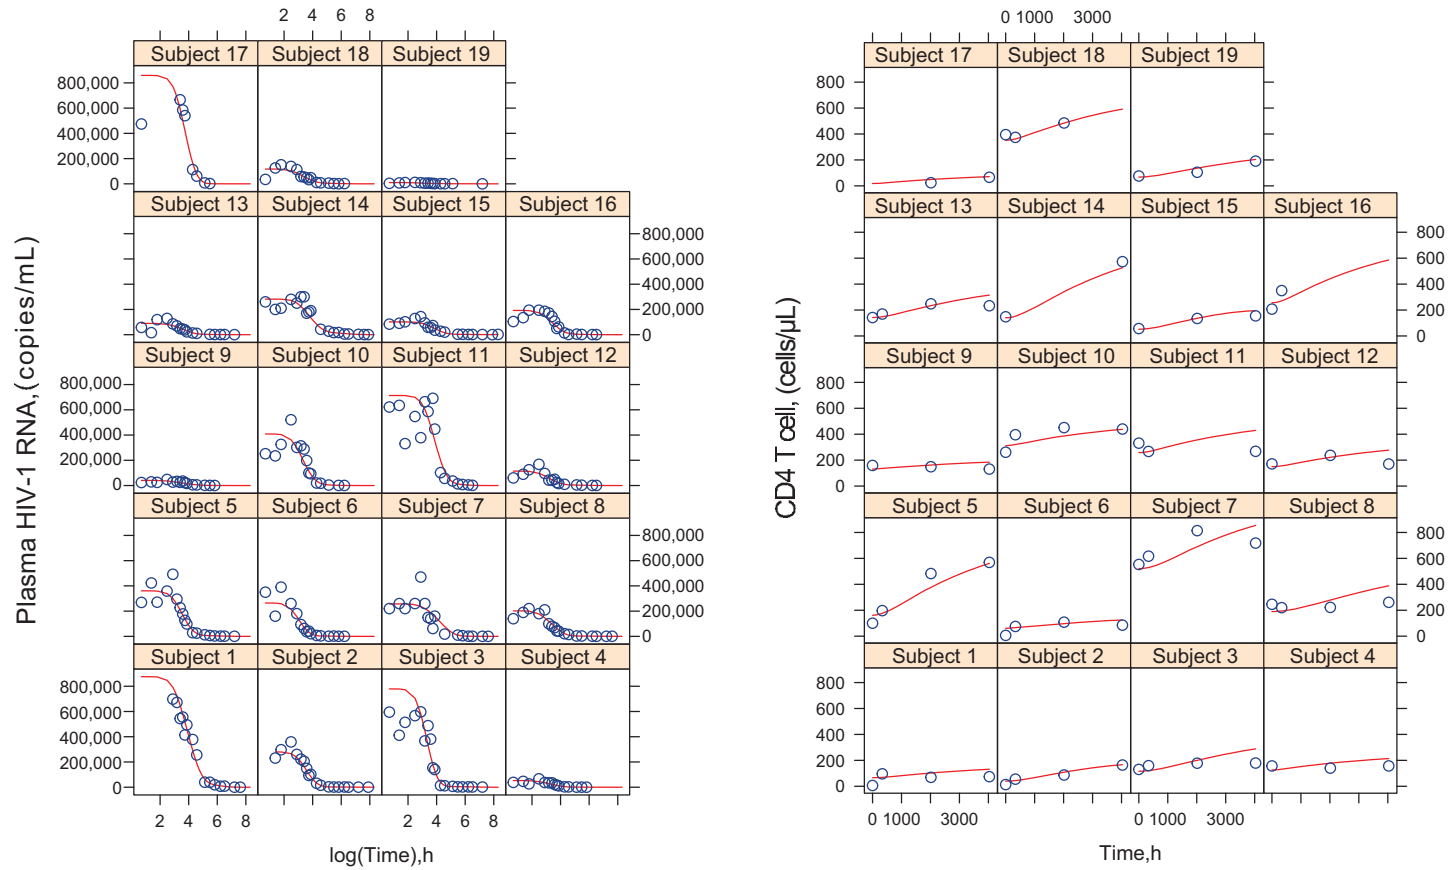

**Supplementary Fig.5.** Individual plots of plasma HIV-1 RNA (left panel) and CD4 T cell count (right panel). Symbols are observed data. Solid red lines are the individual predictions.
